# Supplementary material for: Malaria Temporal Variation and Modelling Using Time-Series in Sussundenga District, Mozambique
Source: MDPI journal article supplement (doi:10.3390/ijerph18115692), 2021-05-26
Supplement: s1 [file s1]

|      | Year  | Weeks | Sussunden | Munhinga | Dombe | C. Mavuzi | Bunga | Darue |
|------|-------|-------|-----------|----------|-------|-----------|-------|-------|
|      | 0 a 4 | 0 a 4 | 0 a 4     | 0 a 4    | 0 a 4 | 0 a 4     | 0 a 4 | 0 a 4 |
| 2015 | 1     | w1    | 387       | 83       | 31    | 86        | 21    | 29    |
|      | 2     | w2    | 341       | 283      | 45    | 96        | 29    | 100   |
|      | 3     | w3    | 558       | 48       | 110   | 137       | 23    | 89    |
|      | 4     | w4    | 504       | 68       | 135   | 100       | 25    | 47    |
|      | 5     | w5    | 411       | 67       | 119   | 100       | 31    | 64    |
|      | 6     | w6    | 329       | 21       | 95    | 56        | 26    | 83    |
|      | 7     | w7    | 293       | 160      | 61    | 63        | 38    | 68    |
|      | 8     | w8    | 314       | 67       | 93    | 61        | 20    | 45    |
|      | 9     | w9    | 362       | 142      | 144   | 71        | 31    | 81    |
|      | 10    | w10   | 339       | 126      | 85    | 71        | 23    | 46    |
|      | 11    | w11   | 404       | 92       | 111   | 83        | 23    | 29    |
|      | 12    | w12   | 252       | 140      | 145   | 98        | 31    | 38    |
|      | 13    | w13   | 325       | 45       | 74    | 89        | 23    | 61    |
|      | 14    | w14   | 302       | 87       | 53    | 75        | 29    | 47    |
|      | 15    | w15   | 271       | 71       | 92    | 60        | 31    | 59    |
|      | 16    | w16   | 275       | 55       | 93    | 89        | 26    | 81    |
|      | 17    | w17   | 292       | 85       | 20    | 81        | 24    | 53    |
|      | 18    | w16   | 273       | 111      | 54    | 108       | 28    | 54    |
|      | 19    | w19   | 283       | 133      | 82    | 97        | 30    | 61    |
|      | 20    | w20   | 251       | 98       | 85    | 66        | 28    | 77    |
|      | 21    | w21   | 177       | 103      | 60    | 121       | 28    | 73    |
|      | 22    | w22   | 241       | 84       | 91    | 104       | 30    | 61    |
|      | 23    | w23   | 217       | 110      | 150   | 49        | 28    | 58    |
|      | 24    | w24   | 204       | 92       | 103   | 59        | 28    | 66    |
|      | 25    | w25   | 177       | 69       | 40    | 63        | 29    | 64    |
|      | 26    | w26   | 179       | 52       | 34    | 56        | 29    | 64    |
|      | 27    | w27   | 200       | 67       | 26    | 63        | 24    | 45    |
|      | 28    | w28   | 146       | 75       | 38    | 52        | 24    | 45    |
|      | 29    | w29   | 131       | 53       | 42    | 46        | 29    | 31    |
|      | 30    | w30   | 133       | 62       | 43    | 38        | 31    | 37    |
|      | 31    | w31   | 128       | 49       | 49    | 35        | 21    | 32    |
|      | 32    | w32   | 131       | 38       | 23    | 32        | 27    | 24    |
|      | 33    | w33   | 103       | 62       | 61    | 42        | 29    | 37    |
|      | 34    | w34   | 100       | 53       | 43    | 34        | 22    | 32    |
|      | 35    | w35   | 109       | 26       | 34    | 30        | 22    | 34    |
|      | 36    | w36   | 65        | 29       | 42    | 25        | 29    | 52    |
|      | 37    | w37   | 112       | 36       | 55    | 35        | 27    | 42    |
|      | 38    | w38   | 105       | 48       | 47    | 35        | 30    | 23    |
|      | 39    | w39   | 50        | 26       | 51    | 61        | 30    | 25    |
|      | 40    | w40   | 110       | 67       | 32    | 47        | 29    | 41    |
|      | 41    | w41   | 145       | 52       | 92    | 51        | 24    | 37    |
|      | 42    | w42   | 191       | 83       | 91    | 59        | 32    | 32    |
|      | 43    | w43   | 192       | 97       | 68    | 64        | 26    | 47    |
|      | 44    | w44   | 183       | 107      | 58    | 53        | 27    | 30    |
|      | 45    | w45   | 165       | 87       | 81    | 42        | 25    | 49    |
|      | 46    | w46   | 232       | 77       | 78    | 42        | 27    | 37    |

|      |    |     |     |     |     |     |    |    |
|------|----|-----|-----|-----|-----|-----|----|----|
|      | 47 | w47 | 207 | 41  | 61  | 48  | 27 | 52 |
|      | 48 | w48 | 178 | 49  | 63  | 53  | 31 | 30 |
|      | 49 | w49 | 179 | 85  | 37  | 51  | 27 | 30 |
|      | 50 | w50 | 326 | 119 | 30  | 68  | 30 | 44 |
|      | 51 | w51 | 263 | 110 | 57  | 68  | 28 | 13 |
| 2016 | 52 | w52 | 303 | 159 | 44  | 68  | 27 | 13 |
|      | 1  | w1  | 369 | 148 | 84  | 101 | 31 | 32 |
|      | 2  | w2  | 381 | 143 | 49  | 86  | 27 | 45 |
|      | 3  | w3  | 252 | 87  | 51  | 61  | 31 | 38 |
|      | 4  | w4  | 312 | 88  | 31  | 57  | 24 | 35 |
|      | 5  | w5  | 390 | 136 | 15  | 56  | 22 | 50 |
|      | 6  | w6  | 380 | 184 | 0   | 60  | 21 | 23 |
|      | 7  | w7  | 443 | 167 | 73  | 96  | 13 | 18 |
|      | 8  | w8  | 367 | 158 | 79  | 73  | 18 | 70 |
|      | 9  | w9  | 302 | 89  | 45  | 52  | 18 | 42 |
|      | 10 | w10 | 282 | 78  | 82  | 96  | 32 | 54 |
|      | 11 | w11 | 247 | 120 | 52  | 65  | 29 | 52 |
|      | 12 | w12 | 251 | 113 | 46  | 67  | 31 | 28 |
|      | 13 | w13 | 306 | 229 | 76  | 93  | 22 | 34 |
|      | 14 | w14 | 249 | 76  | 93  | 56  | 13 | 62 |
|      | 15 | w15 | 232 | 114 | 81  | 99  | 29 | 85 |
|      | 16 | w16 | 321 | 152 | 106 | 99  | 19 | 44 |
|      | 17 | w17 | 290 | 31  | 68  | 82  | 31 | 31 |
|      | 18 | w16 | 283 | 74  | 56  | 51  | 22 | 41 |
|      | 19 | w19 | 226 | 115 | 76  | 74  | 17 | 40 |
|      | 20 | w20 | 275 | 101 | 87  | 73  | 34 | 28 |
|      | 21 | w21 | 203 | 141 | 80  | 68  | 20 | 3  |
|      | 22 | w22 | 295 | 20  | 87  | 48  | 36 | 21 |
|      | 23 | w23 | 212 | 0   | 92  | 56  | 24 | 55 |
|      | 24 | w24 | 209 | 60  | 57  | 73  | 29 | 40 |
|      | 25 | w25 | 170 | 68  | 45  | 65  | 28 | 38 |
|      | 26 | w26 | 185 | 77  | 61  | 71  | 25 | 27 |
|      | 27 | w27 | 98  | 46  | 78  | 72  | 29 | 28 |
|      | 28 | w28 | 167 | 94  | 54  | 61  | 27 | 31 |
|      | 29 | w29 | 162 | 41  | 87  | 65  | 33 | 29 |
|      | 30 | w30 | 164 | 51  | 89  | 68  | 31 | 28 |
|      | 31 | w31 | 128 | 46  | 56  | 69  | 27 | 37 |
|      | 32 | w32 | 150 | 16  | 78  | 71  | 23 | 19 |
|      | 33 | w33 | 160 | 19  | 83  | 78  | 24 | 29 |
|      | 34 | w34 | 141 | 33  | 107 | 61  | 33 | 25 |
|      | 35 | w35 | 118 | 30  | 85  | 53  | 0  | 30 |
|      | 36 | w36 | 83  | 53  | 56  | 74  | 32 | 22 |
|      | 37 | w37 | 104 | 35  | 64  | 59  | 26 | 30 |
|      | 38 | w38 | 124 | 38  | 104 | 71  | 26 | 20 |
|      | 39 | w39 | 151 | 16  | 71  | 82  | 0  | 28 |
|      | 40 | w40 | 193 | 31  | 46  | 60  | 33 | 25 |
|      | 41 | w41 | 152 | 24  | 14  | 74  | 21 | 23 |
|      | 42 | w42 | 193 | 41  | 28  | 68  | 28 | 25 |
|      | 43 | w43 | 207 | 72  | 34  | 62  | 13 | 30 |
|      | 44 | w44 | 208 | 86  | 22  | 66  | 13 | 21 |

|      |    |     |     |     |     |    |    |     |
|------|----|-----|-----|-----|-----|----|----|-----|
|      | 45 | w45 | 261 | 89  | 30  | 71 | 15 | 26  |
|      | 46 | w46 | 272 | 75  | 28  | 60 | 16 | 29  |
|      | 47 | w47 | 238 | 69  | 36  | 63 | 16 | 24  |
|      | 48 | w48 | 215 | 59  | 20  | 58 | 20 | 33  |
|      | 49 | w49 | 252 | 81  | 36  | 68 | 20 | 31  |
|      | 50 | w50 | 135 | 80  | 32  | 73 | 14 | 35  |
|      | 51 | w51 | 179 | 73  | 32  | 66 | 15 | 34  |
|      | 52 | w52 | 163 | 76  | 41  | 59 | 15 | 23  |
| 2017 | 1  | w1  | 451 | 128 | 136 | 90 | 33 | 110 |
|      | 2  | w2  | 483 | 139 | 102 | 64 | 9  | 113 |
|      | 3  | w3  | 472 | 113 | 104 | 21 | 36 | 80  |
|      | 4  | w4  | 385 | 167 | 101 | 37 | 19 | 98  |
|      | 5  | w5  | 303 | 188 | 72  | 43 | 27 | 70  |
|      | 6  | w6  | 330 | 180 | 69  | 51 | 21 | 65  |
|      | 7  | w7  | 207 | 125 | 128 | 51 | 34 | 70  |
|      | 8  | w8  | 326 | 88  | 115 | 27 | 31 | 94  |
|      | 9  | w9  | 292 | 36  | 93  | 47 | 21 | 52  |
|      | 10 | w10 | 239 | 110 | 103 | 49 | 25 | 74  |
|      | 11 | w11 | 200 | 51  | 135 | 58 | 23 | 72  |
|      | 12 | w12 | 263 | 100 | 116 | 52 | 26 | 77  |
|      | 13 | w13 | 268 | 62  | 118 | 63 | 26 | 92  |
|      | 14 | w14 | 248 | 17  | 91  | 27 | 20 | 76  |
|      | 15 | w15 | 212 | 41  | 128 | 36 | 31 | 50  |
|      | 16 | w16 | 183 | 54  | 46  | 69 | 33 | 86  |
|      | 17 | w17 | 211 | 2   | 82  | 20 | 36 | 47  |
|      | 18 | w16 | 201 | 117 | 90  | 80 | 29 | 63  |
|      | 19 | w19 | 223 | 47  | 100 | 53 | 32 | 110 |
|      | 20 | w20 | 196 | 101 | 141 | 29 | 28 | 79  |
|      | 21 | w21 | 179 | 65  | 152 | 42 | 24 | 66  |
|      | 22 | w22 | 179 | 56  | 152 | 42 | 27 | 59  |
|      | 23 | w23 | 99  | 56  | 139 | 16 | 31 | 58  |
|      | 24 | w24 | 73  | 6   | 78  | 26 | 32 | 45  |
|      | 25 | w25 | 74  | 30  | 80  | 41 | 36 | 61  |
|      | 26 | w26 | 65  | 27  | 112 | 54 | 29 | 43  |
|      | 27 | w27 | 103 | 31  | 70  | 45 | 32 | 21  |
|      | 28 | w28 | 49  | 78  | 140 | 32 | 40 | 57  |
|      | 29 | w29 | 58  | 42  | 56  | 21 | 16 | 31  |
|      | 30 | w30 | 58  | 21  | 99  | 47 | 32 | 29  |
|      | 31 | w31 | 297 | 74  | 122 | 21 | 18 | 53  |
|      | 32 | w32 | 33  | 15  | 122 | 26 | 30 | 38  |
|      | 33 | w33 | 68  | 16  | 102 | 35 | 31 | 52  |
|      | 34 | w34 | 24  | 33  | 93  | 16 | 6  | 53  |
|      | 35 | w35 | 47  | 30  | 109 | 36 | 23 | 44  |
|      | 36 | w36 | 48  | 20  | 88  | 12 | 20 | 59  |
|      | 37 | w37 | 62  | 20  | 117 | 29 | 22 | 50  |
|      | 38 | w38 | 88  | 15  | 117 | 26 | 19 | 42  |
|      | 39 | w39 | 60  | 10  | 105 | 22 | 20 | 31  |
|      | 40 | w40 | 46  | 22  | 92  | 25 | 21 | 28  |
|      | 41 | w41 | 41  | 21  | 104 | 39 | 21 | 29  |
|      | 42 | w42 | 36  | 28  | 58  | 28 | 22 | 47  |

|      |    |     |     |     |     |    |    |    |
|------|----|-----|-----|-----|-----|----|----|----|
|      | 43 | w43 | 32  | 30  | 98  | 17 | 28 | 34 |
|      | 44 | w44 | 53  | 5   | 47  | 41 | 19 | 53 |
|      | 45 | w45 | 117 | 13  | 21  | 39 | 19 | 10 |
|      | 46 | w46 | 88  | 40  | 44  | 11 | 20 | 15 |
|      | 47 | w47 | 78  | 54  | 46  | 33 | 18 | 23 |
|      | 48 | w48 | 92  | 53  | 49  | 21 | 25 | 39 |
|      | 49 | w49 | 211 | 58  | 86  | 26 | 50 | 65 |
|      | 50 | w50 | 216 | 89  | 96  | 31 | 53 | 94 |
|      | 51 | w51 | 268 | 30  | 86  | 23 | 17 | 60 |
|      | 52 | w52 | 351 | 60  | 96  | 29 | 49 | 49 |
| 2018 | 1  | w1  | 320 | 12  | 86  | 51 | 42 | 63 |
|      | 2  | w2  | 362 | 62  | 102 | 69 | 79 | 54 |
|      | 3  | w3  | 321 | 97  | 102 | 31 | 95 | 77 |
|      | 4  | w4  | 281 | 58  | 52  | 32 | 32 | 79 |
|      | 5  | w5  | 207 | 89  | 67  | 36 | 79 | 59 |
|      | 6  | w6  | 213 | 54  | 90  | 0  | 91 | 73 |
|      | 7  | w7  | 187 | 54  | 90  | 35 | 59 | 49 |
|      | 8  | w8  | 142 | 57  | 130 | 39 | 0  | 63 |
|      | 9  | w9  | 210 | 67  | 60  | 14 | 86 | 48 |
|      | 10 | w10 | 301 | 36  | 131 | 75 | 0  | 63 |
|      | 11 | w11 | 127 | 72  | 75  | 23 | 64 | 69 |
|      | 12 | w12 | 178 | 78  | 123 | 13 | 21 | 64 |
|      | 13 | w13 | 161 | 68  | 106 | 26 | 64 | 41 |
|      | 14 | w14 | 62  | 113 | 79  | 39 | 73 | 0  |
|      | 15 | w15 | 133 | 122 | 72  | 36 | 84 | 44 |
|      | 16 | w16 | 236 | 118 | 92  | 76 | 70 | 69 |
|      | 17 | w17 | 200 | 91  | 122 | 57 | 58 | 66 |
|      | 18 | w16 | 187 | 104 | 94  | 57 | 72 | 48 |
|      | 19 | w19 | 175 | 91  | 106 | 65 | 82 | 45 |
|      | 20 | w20 | 157 | 61  | 98  | 29 | 87 | 32 |
|      | 21 | w21 | 172 | 64  | 141 | 51 | 77 | 36 |
|      | 22 | w22 | 157 | 42  | 99  | 17 | 72 | 36 |
|      | 23 | w23 | 90  | 64  | 88  | 43 | 0  | 43 |
|      | 24 | w24 | 72  | 73  | 90  | 42 | 67 | 64 |
|      | 25 | w25 | 49  | 46  | 78  | 36 | 72 | 45 |
|      | 26 | w26 | 30  | 40  | 59  | 17 | 76 | 44 |
|      | 27 | w27 | 37  | 46  | 59  | 26 | 64 | 32 |
|      | 28 | w28 | 63  | 42  | 51  | 18 | 64 | 57 |
|      | 29 | w29 | 48  | 33  | 76  | 29 | 43 | 61 |
|      | 30 | w30 | 62  | 0   | 55  | 15 | 38 | 30 |
|      | 31 | w31 | 33  | 41  | 0   | 0  | 0  | 0  |
|      | 32 | w32 | 0   | 0   | 0   | 0  | 0  | 30 |
|      | 33 | w33 | 41  | 0   | 0   | 16 | 0  | 51 |
|      | 34 | w34 | 29  | 24  | 81  | 0  | 55 | 0  |
|      | 35 | w35 | 36  | 27  | 0   | 0  | 0  | 0  |
|      | 36 | w36 | 125 | 36  | 110 | 22 | 42 | 39 |
|      | 37 | w37 | 80  | 69  | 104 | 38 | 51 | 45 |
|      | 38 | w38 | 77  | 67  | 79  | 30 | 47 | 54 |
|      | 39 | w39 | 55  | 39  | 90  | 16 | 40 | 30 |
|      | 40 | w40 | 102 | 42  | 88  | 30 | 34 | 22 |

|      |    |     |     |     |     |     |    |     |
|------|----|-----|-----|-----|-----|-----|----|-----|
|      | 41 | w41 | 70  | 53  | 66  | 10  | 47 | 31  |
|      | 42 | w42 | 112 | 32  | 71  | 31  | 40 | 36  |
|      | 43 | w43 | 57  | 0   | 60  | 24  | 51 | 37  |
|      | 44 | w44 | 149 | 63  | 31  | 24  | 39 | 16  |
|      | 45 | w45 | 87  | 81  | 92  | 27  | 33 | 51  |
|      | 46 | w46 | 151 | 94  | 67  | 34  | 52 | 66  |
|      | 47 | w47 | 117 | 34  | 88  | 41  | 50 | 36  |
|      | 48 | w48 | 188 | 148 | 88  | 31  | 50 | 28  |
|      | 49 | w49 | 271 | 37  | 73  | 56  | 60 | 19  |
|      | 50 | w50 | 263 | 153 | 62  | 43  | 49 | 32  |
|      | 51 | w51 | 82  | 110 | 49  | 9   | 42 | 18  |
|      | 52 | w52 | 226 | 110 | 15  | 27  | 35 | 41  |
| 2019 | 1  | w1  | 297 | 193 | 59  | 11  | 21 | 42  |
|      | 2  | w2  | 371 | 212 | 67  | 10  | 29 | 88  |
|      | 3  | w3  | 392 | 293 | 73  | 54  | 23 | 93  |
|      | 4  | w4  | 503 | 214 | 9   | 56  | 25 | 61  |
|      | 5  | w5  | 299 | 233 | 121 | 39  | 31 | 41  |
|      | 6  | w6  | 436 | 147 | 91  | 36  | 26 | 63  |
|      | 7  | w7  | 341 | 176 | 107 | 42  | 38 | 38  |
|      | 8  | w8  | 298 | 202 | 99  | 97  | 20 | 24  |
|      | 9  | w9  | 392 | 227 | 162 | 93  | 31 | 100 |
|      | 10 | w10 | 434 | 63  | 146 | 36  | 37 | 97  |
|      | 11 | w11 | 229 | 127 | 111 | 13  | 23 | 29  |
|      | 12 | w12 | 233 | 73  | 38  | 6   | 31 | 59  |
|      | 13 | w13 | 221 | 305 | 126 | 5   | 23 | 80  |
|      | 14 | w14 | 217 | 306 | 160 | 34  | 29 | 82  |
|      | 15 | w15 | 184 | 160 | 142 | 101 | 51 | 59  |
|      | 16 | w16 | 206 | 139 | 145 | 42  | 37 | 80  |
|      | 17 | w17 | 202 | 153 | 134 | 42  | 50 | 55  |
|      | 18 | w16 | 193 | 123 | 207 | 108 | 44 | 35  |
|      | 19 | w19 | 278 | 223 | 176 | 113 | 51 | 84  |
|      | 20 | w20 | 215 | 113 | 163 | 72  | 28 | 74  |
|      | 21 | w21 | 501 | 214 | 130 | 70  | 37 | 15  |
|      | 22 | w22 | 303 | 258 | 134 | 104 | 48 | 38  |
|      | 23 | w23 | 378 | 166 | 140 | 45  | 34 | 44  |
|      | 24 | w24 | 245 | 64  | 101 | 64  | 44 | 50  |
|      | 25 | w25 | 227 | 109 | 123 | 57  | 27 | 54  |
|      | 26 | w26 | 230 | 0   | 105 | 50  | 29 | 27  |
|      | 27 | w27 | 209 | 103 | 90  | 40  | 24 | 41  |
|      | 28 | w28 | 189 | 155 | 38  | 52  | 24 | 45  |
|      | 29 | w29 | 165 | 98  | 94  | 57  | 77 | 71  |
|      | 30 | w30 | 151 | 46  | 87  | 31  | 31 | 67  |
|      | 31 | w31 | 180 | 41  | 49  | 35  | 63 | 32  |
|      | 32 | w32 | 104 | 115 | 72  | 44  | 84 | 50  |
|      | 33 | w33 | 115 | 91  | 86  | 32  | 63 | 52  |
|      | 34 | w34 | 32  | 86  | 100 | 34  | 83 | 44  |
|      | 35 | w35 | 140 | 166 | 34  | 30  | 22 | 34  |
|      | 36 | w36 | 152 | 62  | 42  | 25  | 29 | 52  |
|      | 37 | w37 | 214 | 59  | 101 | 37  | 27 | 42  |
|      | 38 | w38 | 284 | 139 | 47  | 35  | 35 | 23  |

|  |    |       |       |       |       |       |      |       |
|--|----|-------|-------|-------|-------|-------|------|-------|
|  | 39 | w39   | 177   | 53    | 68    | 41    | 30   | 28    |
|  | 40 | w40   | 162   | 71    | 85    | 21    | 29   | 33    |
|  | 41 | w41   | 211   | 82    | 105   | 38    | 24   | 47    |
|  | 42 | w42   | 178   | 70    | 67    | 16    | 32   | 54    |
|  | 43 | w43   | 162   | 88    | 72    | 40    | 26   | 48    |
|  | 44 | w44   | 94    | 84    | 76    | 31    | 38   | 60    |
|  | 45 | w45   | 93    | 140   | 81    | 42    | 26   | 43    |
|  | 46 | w46   | 184   | 91    | 78    | 42    | 45   | 31    |
|  | 47 | w47   | 226   | 116   | 61    | 65    | 39   | 34    |
|  | 48 | w48   | 254   | 173   | 63    | 53    | 28   | 17    |
|  | 49 | w49   | 151   | 166   | 37    | 51    | 44   | 30    |
|  | 50 | w50   | 226   | 132   | 30    | 68    | 42   | 48    |
|  | 51 | w51   | 140   | 189   | 57    | 50    | 49   | 49    |
|  | 52 | w52   | 139   | 90    | 44    | 40    | 32   | 13    |
|  |    | Total | 52137 | 21611 | 20499 | 12863 | 8415 | 11867 |

| Matarara | Sembezeia | Nhambam | Rupisse | IFLOMA | Rotanda | Moha  | Total |
|----------|-----------|---------|---------|--------|---------|-------|-------|
| 0 a 4    | 0 a 4     | 0 a 4   | 0 a 4   | 0 a 4  | 0 a 4   | 0 a 4 | 0 a 4 |
| 24       | 41        | 12      | 56      | 23     | 16      | 27    | 836   |
| 59       | 63        | 42      | 50      | 31     | 22      | 24    | 1185  |
| 56       | 53        | 69      | 46      | 11     | 28      | 26    | 1254  |
| 48       | 47        | 11      | 34      | 27     | 26      | 20    | 1091  |
| 44       | 30        | 38      | 34      | 26     | 17      | 23    | 1005  |
| 19       | 36        | 10      | 27      | 21     | 20      | 24    | 767   |
| 22       | 58        | 6       | 25      | 24     | 17      | 26    | 861   |
| 40       | 56        | 11      | 37      | 21     | 23      | 23    | 811   |
| 39       | 80        | 61      | 46      | 26     | 18      | 26    | 1127  |
| 31       | 64        | 68      | 32      | 19     | 37      | 29    | 970   |
| 33       | 80        | 99      | 25      | 60     | 38      | 35    | 1111  |
| 35       | 71        | 110     | 17      | 52     | 25      | 22    | 1036  |
| 32       | 69        | 29      | 47      | 60     | 23      | 24    | 901   |
| 33       | 78        | 78      | 32      | 52     | 30      | 27    | 922   |
| 24       | 72        | 163     | 64      | 44     | 29      | 24    | 1004  |
| 39       | 66        | 53      | 51      | 53     | 33      | 47    | 961   |
| 70       | 37        | 54      | 83      | 53     | 28      | 47    | 927   |
| 41       | 62        | 102     | 50      | 60     | 26      | 44    | 1013  |
| 53       | 53        | 101     | 58      | 46     | 32      | 63    | 1092  |
| 49       | 24        | 88      | 51      | 35     | 15      | 42    | 909   |
| 32       | 32        | 68      | 43      | 29     | 12      | 36    | 814   |
| 17       | 39        | 37      | 24      | 24     | 6       | 32    | 790   |
| 32       | 23        | 33      | 62      | 30     | 6       | 24    | 822   |
| 44       | 35        | 54      | 32      | 33     | 14      | 25    | 789   |
| 25       | 47        | 30      | 33      | 32     | 7       | 29    | 645   |
| 21       | 40        | 21      | 30      | 14     | 8       | 21    | 568   |
| 16       | 18        | 23      | 22      | 18     | 15      | 36    | 573   |
| 20       | 20        | 38      | 22      | 10     | 7       | 31    | 528   |
| 15       | 10        | 25      | 21      | 11     | 5       | 32    | 451   |
| 15       | 21        | 19      | 9       | 7      | 4       | 23    | 442   |
| 25       | 40        | 17      | 24      | 6      | 2       | 12    | 440   |
| 12       | 40        | 19      | 13      | 4      | 2       | 16    | 381   |
| 17       | 22        | 15      | 18      | 9      | 3       | 16    | 434   |
| 11       | 28        | 28      | 15      | 18     | 5       | 13    | 402   |
| 12       | 26        | 16      | 23      | 5      | 3       | 14    | 354   |
| 32       | 17        | 29      | 16      | 9      | 7       | 15    | 367   |
| 20       | 13        | 19      | 21      | 8      | 8       | 25    | 421   |
| 15       | 19        | 31      | 30      | 16     | 12      | 27    | 438   |
| 15       | 13        | 38      | 21      | 12     | 3       | 30    | 375   |
| 13       | 24        | 21      | 16      | 15     | 3       | 24    | 442   |
| 31       | 28        | 37      | 18      | 17     | 7       | 26    | 565   |
| 15       | 28        | 15      | 15      | 10     | 7       | 36    | 614   |
| 29       | 20        | 22      | 35      | 23     | 7       | 32    | 662   |
| 35       | 41        | 48      | 40      | 24     | 13      | 37    | 696   |
| 15       | 33        | 30      | 45      | 30     | 13      | 33    | 648   |
| 27       | 31        | 52      | 34      | 22     | 8       | 34    | 700   |

|    |    |    |    |    |    |    |      |
|----|----|----|----|----|----|----|------|
| 24 | 23 | 34 | 30 | 21 | 7  | 32 | 606  |
| 25 | 30 | 0  | 25 | 33 | 7  | 32 | 556  |
| 28 | 52 | 0  | 21 | 21 | 16 | 42 | 589  |
| 19 | 37 | 5  | 37 | 33 | 18 | 42 | 808  |
| 33 | 52 | 81 | 17 | 38 | 13 | 45 | 817  |
| 25 | 27 | 25 | 29 | 34 | 14 | 41 | 809  |
| 23 | 46 | 37 | 37 | 49 | 29 | 54 | 702  |
| 34 | 55 | 84 | 65 | 54 | 32 | 97 | 1152 |
| 21 | 69 | 72 | 58 | 42 | 29 | 54 | 865  |
| 16 | 56 | 78 | 42 | 45 | 36 | 67 | 887  |
| 14 | 41 | 68 | 46 | 53 | 8  | 81 | 980  |
| 13 | 12 | 0  | 47 | 67 | 52 | 21 | 880  |
| 22 | 42 | 45 | 83 | 67 | 14 | 76 | 1159 |
| 21 | 76 | 88 | 22 | 76 | 10 | 36 | 1094 |
| 15 | 45 | 35 | 38 | 61 | 13 | 39 | 794  |
| 19 | 55 | 37 | 38 | 55 | 37 | 52 | 916  |
| 16 | 67 | 28 | 43 | 37 | 15 | 54 | 825  |
| 10 | 54 | 56 | 41 | 39 | 31 | 49 | 816  |
| 16 | 42 | 42 | 26 | 56 | 28 | 62 | 1032 |
| 14 | 46 | 40 | 38 | 37 | 17 | 63 | 804  |
| 49 | 66 | 43 | 67 | 64 | 24 | 52 | 1005 |
| 27 | 10 | 25 | 52 | 52 | 27 | 55 | 989  |
| 25 | 12 | 30 | 46 | 36 | 13 | 39 | 734  |
| 33 | 56 | 52 | 36 | 40 | 10 | 30 | 784  |
| 33 | 17 | 40 | 45 | 21 | 16 | 28 | 748  |
| 37 | 28 | 47 | 53 | 37 | 9  | 20 | 829  |
| 36 | 38 | 75 | 59 | 37 | 27 | 40 | 827  |
| 53 | 35 | 45 | 30 | 21 | 12 | 31 | 734  |
| 35 | 25 | 21 | 31 | 26 | 8  | 32 | 617  |
| 29 | 23 | 48 | 41 | 8  | 2  | 31 | 650  |
| 10 | 33 | 30 | 20 | 17 | 5  | 23 | 551  |
| 29 | 23 | 39 | 34 | 17 | 3  | 20 | 611  |
| 32 | 26 | 48 | 25 | 12 | 1  | 13 | 508  |
| 23 | 31 | 0  | 32 | 52 | 2  | 28 | 602  |
| 31 | 29 | 11 | 12 | 15 | 5  | 19 | 539  |
| 46 | 26 | 49 | 29 | 13 | 5  | 16 | 615  |
| 17 | 22 | 40 | 23 | 10 | 2  | 11 | 488  |
| 11 | 18 | 18 | 16 | 6  | 3  | 9  | 439  |
| 29 | 19 | 47 | 10 | 10 | 5  | 54 | 567  |
| 21 | 15 | 43 | 16 | 9  | 2  | 7  | 513  |
| 6  | 15 | 32 | 16 | 4  | 1  | 21 | 411  |
| 29 | 11 | 33 | 8  | 7  | 2  | 12 | 422  |
| 22 | 11 | 37 | 14 | 24 | 5  | 20 | 451  |
| 17 | 24 | 30 | 7  | 8  | 5  | 13 | 487  |
| 30 | 20 | 17 | 27 | 0  | 5  | 11 | 458  |
| 21 | 21 | 29 | 27 | 3  | 6  | 32 | 527  |
| 21 | 27 | 11 | 25 | 11 | 5  | 31 | 439  |
| 30 | 29 | 21 | 22 | 3  | 4  | 31 | 522  |
| 22 | 35 | 50 | 40 | 23 | 10 | 55 | 651  |
| 11 | 36 | 53 | 40 | 24 | 17 | 46 | 642  |

|    |    |     |    |    |    |    |      |
|----|----|-----|----|----|----|----|------|
| 23 | 18 | 29  | 21 | 34 | 12 | 46 | 676  |
| 22 | 39 | 46  | 25 | 26 | 19 | 31 | 687  |
| 23 | 26 | 31  | 38 | 32 | 17 | 53 | 666  |
| 15 | 32 | 32  | 27 | 51 | 5  | 34 | 601  |
| 16 | 27 | 33  | 25 | 23 | 15 | 39 | 667  |
| 13 | 42 | 49  | 46 | 31 | 9  | 43 | 601  |
| 26 | 40 | 38  | 39 | 30 | 10 | 45 | 628  |
| 26 | 36 | 41  | 27 | 57 | 14 | 45 | 624  |
| 42 | 43 | 127 | 28 | 81 | 43 | 23 | 715  |
| 39 | 37 | 109 | 19 | 58 | 33 | 17 | 1222 |
| 61 | 33 | 92  | 23 | 35 | 34 | 23 | 1127 |
| 9  | 15 | 29  | 31 | 70 | 44 | 67 | 1072 |
| 15 | 53 | 132 | 24 | 34 | 33 | 11 | 1005 |
| 14 | 61 | 98  | 22 | 33 | 15 | 50 | 1009 |
| 26 | 85 | 70  | 10 | 41 | 36 | 50 | 933  |
| 32 | 75 | 12  | 23 | 55 | 58 | 78 | 1014 |
| 25 | 86 | 45  | 23 | 35 | 38 | 15 | 808  |
| 51 | 46 | 71  | 35 | 65 | 56 | 42 | 966  |
| 40 | 51 | 48  | 56 | 56 | 56 | 11 | 857  |
| 22 | 11 | 27  | 26 | 33 | 52 | 28 | 833  |
| 22 | 24 | 6   | 3  | 18 | 25 | 13 | 740  |
| 17 | 6  | 35  | 11 | 32 | 22 | 18 | 620  |
| 34 | 12 | 66  | 5  | 26 | 23 | 4  | 668  |
| 23 | 7  | 10  | 15 | 15 | 24 | 20 | 585  |
| 24 | 13 | 67  | 34 | 46 | 39 | 15 | 636  |
| 15 | 33 | 47  | 21 | 37 | 22 | 18 | 773  |
| 47 | 43 | 124 | 44 | 75 | 39 | 20 | 957  |
| 14 | 11 | 77  | 30 | 40 | 28 | 60 | 834  |
| 21 | 17 | 76  | 29 | 33 | 33 | 28 | 765  |
| 28 | 54 | 76  | 22 | 30 | 21 | 30 | 776  |
| 40 | 33 | 9   | 16 | 8  | 14 | 10 | 529  |
| 40 | 35 | 9   | 23 | 23 | 11 | 70 | 471  |
| 28 | 48 | 15  | 26 | 18 | 4  | 30 | 491  |
| 8  | 47 | 44  | 20 | 15 | 29 | 27 | 520  |
| 45 | 53 | 37  | 36 | 13 | 15 | 9  | 510  |
| 24 | 15 | 17  | 16 | 20 | 30 | 10 | 528  |
| 5  | 5  | 18  | 35 | 12 | 21 | 21 | 341  |
| 19 | 38 | 23  | 61 | 12 | 44 | 16 | 499  |
| 24 | 20 | 17  | 24 | 10 | 12 | 19 | 711  |
| 5  | 22 | 12  | 13 | 12 | 15 | 18 | 361  |
| 18 | 24 | 14  | 12 | 4  | 20 | 4  | 400  |
| 24 | 33 | 18  | 19 | 4  | 34 | 10 | 367  |
| 17 | 33 | 16  | 7  | 18 | 22 | 14 | 416  |
| 19 | 18 | 6   | 23 | 4  | 9  | 7  | 333  |
| 20 | 77 | 55  | 11 | 36 | 19 | 25 | 543  |
| 21 | 77 | 43  | 25 | 21 | 21 | 17 | 531  |
| 24 | 44 | 56  | 20 | 40 | 30 | 30 | 491  |
| 24 | 25 | 25  | 25 | 40 | 29 | 18 | 419  |
| 23 | 26 | 53  | 18 | 13 | 31 | 25 | 444  |
| 31 | 44 | 17  | 10 | 12 | 41 | 18 | 392  |

|    |    |     |    |    |    |    |      |
|----|----|-----|----|----|----|----|------|
| 25 | 28 | 70  | 20 | 22 | 25 | 30 | 460  |
| 15 | 19 | 37  | 34 | 29 | 30 | 25 | 407  |
| 9  | 43 | 49  | 18 | 17 | 9  | 20 | 384  |
| 12 | 38 | 25  | 6  | 13 | 22 | 13 | 347  |
| 22 | 24 | 10  | 16 | 12 | 36 | 11 | 383  |
| 17 | 24 | 19  | 15 | 23 | 44 | 14 | 435  |
| 17 | 30 | 41  | 21 | 23 | 24 | 47 | 699  |
| 24 | 33 | 16  | 25 | 30 | 27 | 60 | 793  |
| 16 | 34 | 60  | 23 | 19 | 20 | 50 | 706  |
| 18 | 37 | 88  | 28 | 28 | 33 | 22 | 887  |
| 26 | 0  | 81  | 39 | 56 | 31 | 60 | 457  |
| 39 | 57 | 158 | 43 | 27 | 42 | 40 | 1134 |
| 0  | 73 | 2   | 40 | 0  | 0  | 40 | 878  |
| 15 | 51 | 12  | 28 | 12 | 0  | 40 | 692  |
| 31 | 53 | 101 | 33 | 35 | 0  | 40 | 830  |
| 0  | 57 | 0   | 18 | 37 | 0  | 50 | 683  |
| 0  | 52 | 81  | 47 | 39 | 0  | 40 | 733  |
| 0  | 68 | 14  | 53 | 0  | 0  | 40 | 606  |
| 31 | 64 | 78  | 44 | 17 | 0  | 40 | 759  |
| 0  | 68 | 0   | 41 | 16 | 0  | 0  | 731  |
| 52 | 0  | 0   | 25 | 0  | 0  | 31 | 538  |
| 2  | 0  | 0   | 34 | 22 | 0  | 0  | 535  |
| 32 | 0  | 113 | 19 | 13 | 28 | 28 | 699  |
| 51 | 0  | 0   | 36 | 18 | 0  | 0  | 471  |
| 54 | 0  | 0   | 32 | 0  | 22 | 30 | 629  |
| 58 | 47 | 0   | 25 | 0  | 18 | 0  | 809  |
| 1  | 43 | 52  | 25 | 16 | 21 | 0  | 752  |
| 38 | 23 | 48  | 40 | 12 | 19 | 21 | 763  |
| 63 | 35 | 75  | 25 | 0  | 22 | 19 | 803  |
| 38 | 23 | 0   | 23 | 0  | 19 | 0  | 567  |
| 0  | 21 | 0   | 13 | 51 | 0  | 20 | 646  |
| 29 | 18 | 0   | 14 | 10 | 0  | 22 | 516  |
| 0  | 16 | 0   | 25 | 0  | 0  | 23 | 392  |
| 0  | 25 | 0   | 28 | 9  | 26 | 27 | 523  |
| 44 | 7  | 0   | 13 | 0  | 0  | 0  | 390  |
| 25 | 12 | 0   | 11 | 4  | 0  | 17 | 335  |
| 0  | 0  | 0   | 13 | 2  | 31 | 0  | 310  |
| 29 | 0  | 0   | 12 | 0  | 0  | 11 | 347  |
| 47 | 0  | 0   | 10 | 0  | 22 | 16 | 385  |
| 25 | 0  | 0   | 11 | 0  | 0  | 19 | 255  |
| 0  | 8  | 0   | 0  | 0  | 0  | 0  | 82   |
| 0  | 0  | 0   | 0  | 0  | 0  | 0  | 30   |
| 0  | 0  | 0   | 4  | 0  | 0  | 6  | 118  |
| 0  | 0  | 0   | 15 | 0  | 0  | 0  | 204  |
| 0  | 0  | 0   | 0  | 0  | 0  | 0  | 63   |
| 0  | 0  | 20  | 15 | 3  | 0  | 8  | 420  |
| 0  | 0  | 21  | 0  | 1  | 0  | 10 | 419  |
| 0  | 0  | 37  | 0  | 4  | 0  | 11 | 406  |
| 0  | 0  | 17  | 0  | 3  | 14 | 19 | 323  |
| 33 | 11 | 33  | 18 | 0  | 9  | 13 | 435  |

|    |     |     |    |    |    |    |      |
|----|-----|-----|----|----|----|----|------|
| 40 | 11  | 26  | 20 | 1  | 17 | 14 | 406  |
| 29 | 18  | 31  | 18 | 3  | 11 | 0  | 432  |
| 21 | 0   | 2   | 17 | 0  | 16 | 0  | 286  |
| 45 | 26  | 31  | 23 | 5  | 11 | 19 | 483  |
| 42 | 23  | 48  | 23 | 8  | 15 | 26 | 556  |
| 42 | 23  | 30  | 18 | 21 | 11 | 42 | 651  |
| 27 | 41  | 37  | 12 | 9  | 22 | 30 | 544  |
| 22 | 42  | 64  | 17 | 9  | 21 | 17 | 725  |
| 41 | 46  | 120 | 17 | 13 | 29 | 60 | 842  |
| 40 | 49  | 58  | 15 | 8  | 1  | 27 | 800  |
| 39 | 43  | 98  | 38 | 12 | 23 | 11 | 574  |
| 29 | 29  | 31  | 21 | 8  | 26 | 48 | 645  |
| 24 | 41  | 104 | 56 | 19 | 20 | 34 | 257  |
| 59 | 42  | 159 | 50 | 17 | 22 | 32 | 1158 |
| 56 | 78  | 69  | 46 | 14 | 28 | 26 | 1245 |
| 48 | 78  | 11  | 34 | 17 | 31 | 19 | 1106 |
| 44 | 62  | 132 | 34 | 23 | 17 | 28 | 1104 |
| 19 | 36  | 10  | 27 | 27 | 20 | 19 | 957  |
| 22 | 58  | 74  | 25 | 21 | 17 | 26 | 984  |
| 40 | 61  | 12  | 37 | 27 | 26 | 25 | 968  |
| 39 | 91  | 13  | 46 | 26 | 18 | 25 | 1263 |
| 31 | 122 | 23  | 32 | 28 | 37 | 21 | 1107 |
| 33 | 46  | 99  | 31 | 28 | 38 | 31 | 838  |
| 35 | 10  | 81  | 17 | 26 | 25 | 22 | 656  |
| 32 | 69  | 29  | 47 | 60 | 23 | 28 | 1048 |
| 33 | 80  | 60  | 32 | 52 | 12 | 31 | 1128 |
| 24 | 72  | 163 | 64 | 44 | 29 | 21 | 1115 |
| 39 | 1   | 93  | 51 | 53 | 17 | 32 | 935  |
| 70 | 44  | 54  | 83 | 53 | 13 | 47 | 1000 |
| 41 | 43  | 102 | 50 | 60 | 26 | 44 | 1076 |
| 53 | 56  | 31  | 58 | 46 | 10 | 63 | 1242 |
| 49 | 59  | 132 | 39 | 35 | 22 | 42 | 1043 |
| 32 | 63  | 0   | 43 | 29 | 18 | 36 | 1188 |
| 17 | 42  | 79  | 24 | 24 | 12 | 32 | 1115 |
| 32 | 54  | 56  | 62 | 30 | 13 | 24 | 1078 |
| 44 | 52  | 0   | 32 | 33 | 12 | 25 | 766  |
| 25 | 41  | 54  | 33 | 32 | 16 | 29 | 827  |
| 21 | 31  | 54  | 30 | 14 | 5  | 30 | 626  |
| 16 | 48  | 23  | 22 | 18 | 12 | 36 | 682  |
| 20 | 20  | 33  | 22 | 10 | 7  | 31 | 646  |
| 15 | 10  | 25  | 21 | 21 | 6  | 26 | 686  |
| 37 | 21  | 11  | 9  | 7  | 2  | 23 | 523  |
| 25 | 40  | 17  | 24 | 6  | 2  | 12 | 526  |
| 12 | 40  | 19  | 13 | 3  | 2  | 16 | 574  |
| 17 | 15  | 21  | 18 | 2  | 1  | 20 | 533  |
| 11 | 28  | 28  | 14 | 18 | 2  | 21 | 501  |
| 12 | 26  | 16  | 23 | 5  | 3  | 14 | 525  |
| 32 | 17  | 36  | 16 | 9  | 7  | 15 | 494  |
| 20 | 11  | 19  | 21 | 8  | 1  | 25 | 585  |
| 15 | 19  | 18  | 30 | 16 | 14 | 27 | 701  |

|      |      |       |      |      |      |      |        |
|------|------|-------|------|------|------|------|--------|
| 15   | 20   | 15    | 21   | 12   | 3    | 30   | 513    |
| 13   | 13   | 25    | 16   | 15   | 2    | 24   | 509    |
| 56   | 24   | 40    | 18   | 17   | 8    | 26   | 696    |
| 56   | 32   | 32    | 15   | 10   | 5    | 36   | 603    |
| 29   | 33   | 32    | 35   | 23   | 7    | 32   | 627    |
| 26   | 51   | 48    | 24   | 24   | 6    | 37   | 599    |
| 15   | 33   | 30    | 45   | 28   | 13   | 33   | 622    |
| 18   | 31   | 52    | 34   | 34   | 8    | 25   | 673    |
| 22   | 23   | 34    | 30   | 33   | 10   | 31   | 725    |
| 27   | 30   | 0     | 25   | 31   | 7    | 32   | 740    |
| 33   | 52   | 0     | 21   | 21   | 16   | 17   | 640    |
| 35   | 37   | 5     | 37   | 33   | 18   | 42   | 753    |
| 24   | 52   | 81    | 32   | 38   | 12   | 45   | 818    |
| 35   | 27   | 25    | 33   | 34   | 14   | 41   | 566    |
| 6657 | 8937 | 10226 | 7312 | 6117 | 4072 | 7244 | 177957 |
